# Supplementary material for: A test method to evaluate chronic particulate generation from durable polymer stent coatings: a case study of CYPHER® sirolimus-eluting coronary stents
Source: Royal Society of Chemistry journal article supplement (doi:10.1039/c2ay25030f), 2012-01-01
Supplement: c2ay25030f.pdf [file c2ay25030f.pdf]

## Supplemental Information

### A Test Method to Evaluate Chronic Particulate Generation from Durable Polymer Stent Coatings: A Case Study of CYPHER<sup>®</sup> Sirolimus-eluting Coronary Stents

Judith H. Cohen,<sup>a\*</sup> Karin M. Balss, Eugena Akerman-Revis, Mark Inderbitzen, James Lisk, Asha Marathe, Robert O'Brien, Elaine Pottinger-Cooper, William Rudd, Cheryl Wendel, George Papandreou, and Cynthia A. Maryanoff

#### Experimental

##### Samples:

5 stents each of CYPHER<sup>®</sup> (2.5 x 18) and Competitor A (3 x 20 mm) and 3 stents of Competitor B (3.0 x 18 mm) were selected for analysis.

##### Simulated Acute Testing

During testing the stent is delivered through a tortuous track designed per ASTM F2394 followed by deployment at rated burst pressure (RBP) in a mock artery with an approximate 15 mm radius bend. After removal of the delivery catheter, the entire delivery path is flushed with a flow of 0.1% sodium dodecyl sulfate (SDS) in water and captured into a pre-cleaned particle collection vial. The contents of the vial are then subjected to light obscuration analysis to size and quantify particulates generated during deployment.

#### Results

Figure S1 compares the average amount of particulates observed for the three stent products. The USP 788 guideline amount (<6000) is shown for reference. Competitor A had significantly more particles than CYPHER<sup>®</sup> and competitor B and was above the USP 788 limit for particles greater than 10 µm. For particles greater than 25 µm, Competitor B < CYPHER<sup>®</sup> < Competitor A and all three products displayed levels well below USP788 limits.

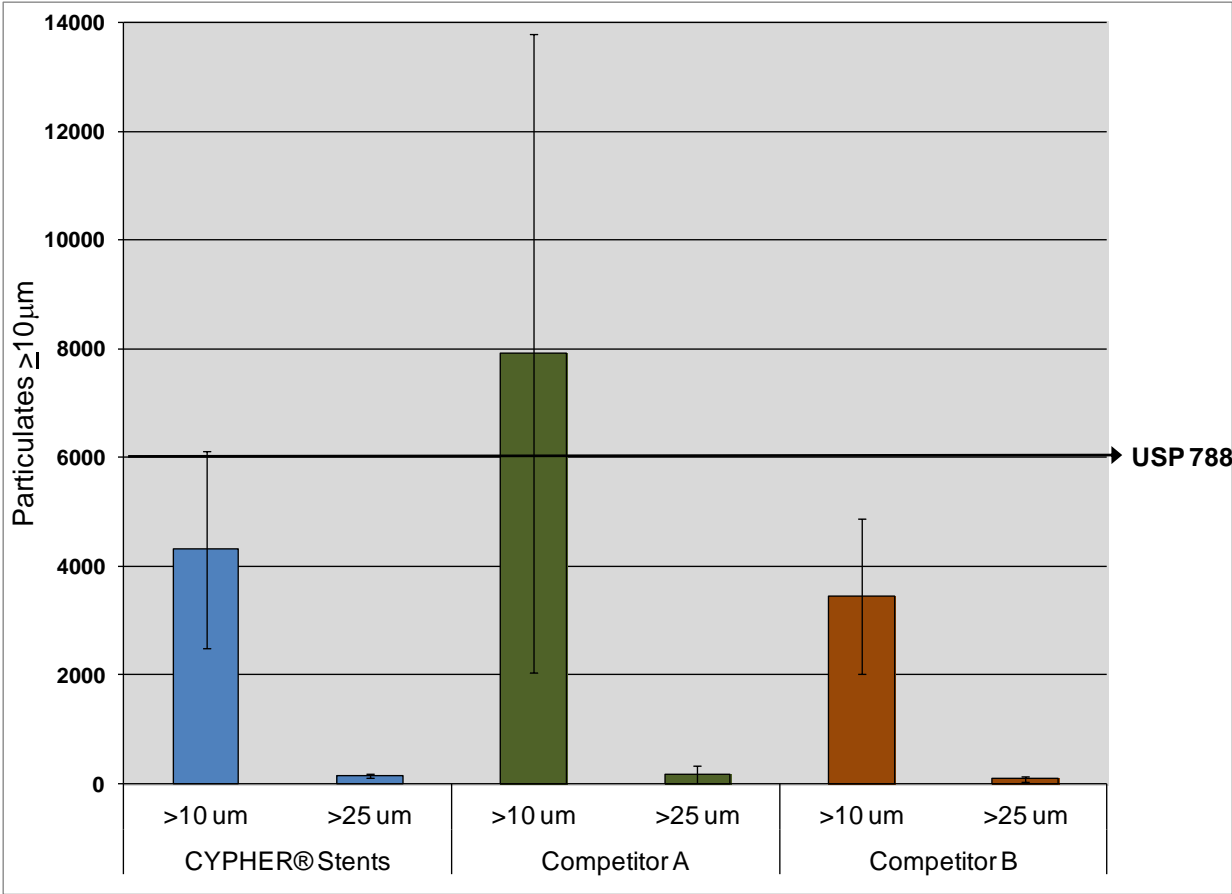

Figure S1. A comparison of acute particulate data for three different DES products for particles  $>10 \mu\text{m}$  and  $>25 \mu\text{m}$ .
